# Supplementary material for: Organic–inorganic hybrid catalysts containing new Schiff base for environment friendly cyclohexane oxidation
Source: Royal Society of Chemistry journal article supplement (doi:10.1039/c4ra08303b), 2014-01-01
Supplement: c4ra08303b1.pdf [file c4ra08303b1.pdf]

## Organic-Inorganic Hybrid Catalysts Containing New Schiff Base for Environment Friendly Cyclohexane Oxidation

R. Antony,<sup>†</sup> S. Theodore David Manickam,<sup>\*,†</sup> K. Karuppasamy,<sup>†</sup> and Pratap Kollu,<sup>‡</sup>  
V. Chandrasekar<sup>§</sup>

<sup>†</sup>Centre for Scientific and Applied Research, PSN College of Engineering and Technology  
(Autonomous), Tirunelveli-627152, Tamil Nadu, India

<sup>‡</sup>Department of Metallurgical Engineering and Material Science, Indian Institute of Technology  
Bombay, Mumbai-400076, India

<sup>§</sup>College of Physics and Information Engineering, Institute of Optoelectronic Display, Fuzhou  
University, Fuzhou-350002, PR China

### Table of Contents

1. EDS analysis of SiO<sub>2</sub> Gel
2. EDS analysis of Si-NH<sub>2</sub>
3. EDS analysis of Si-NH<sub>2</sub>-DPED
4. EDS analysis of [Cu(Si-NH<sub>2</sub>-DPED)Cl<sub>2</sub>]
5. EDS analysis of [Co(Si-NH<sub>2</sub>-DPED)Cl<sub>2</sub>]
6. EDS analysis of [Ni(Si-NH<sub>2</sub>-DPED)Cl<sub>2</sub>]
7. UV-Vis. spectrum of SiO<sub>2</sub> gel (**Fig. S1**)
8. UV-Vis. Spectrum of Si-NH<sub>2</sub> (**Fig. S2**)
9. <sup>29</sup>Si CP MAS NMR spectrum of Si-NH<sub>2</sub>-DPED (**Fig. S3**)
10. <sup>29</sup>Si CP MAS NMR spectrum of [Cu(Si-NH<sub>2</sub>-DPED)Cl<sub>2</sub>] (**Fig. S4**)
11. TG-DTG curves of SiO<sub>2</sub> gel (**Fig. S5**)
12. TG-DTG curves of Si-NH<sub>2</sub> (**Fig. S6**)
13. SEM image of SiO<sub>2</sub> gel (**Fig. S7**)
14. SEM image of Si-NH<sub>2</sub> (**Fig. S8**)
15. Synthetic Scheme of Complexes (**Fig. S9**)
16. Influence of reaction time on cyclohexane oxidation catalyzed by Cu(II), Co(II) and Ni(II) hybrid catalysts (**Table 1**)
17. Mechanism of cyclohexane oxidation
  - i. UV-Vis. spectrum of the mixture ([Cu(Si-NH<sub>2</sub>-DPED)Cl<sub>2</sub>], H<sub>2</sub>O<sub>2</sub>, HNO<sub>3</sub> and CH<sub>3</sub>CN) (**Fig. S10**)
  - ii. Magnified UV-Vis. spectrum of the mixture ([Cu(Si-NH<sub>2</sub>-DPED)Cl<sub>2</sub>], H<sub>2</sub>O<sub>2</sub>, HNO<sub>3</sub> and CH<sub>3</sub>CN) (**Fig. S11**)
  - iii. UV-Vis. spectrum of the mixture ([Co(Si-NH<sub>2</sub>-DPED)Cl<sub>2</sub>], H<sub>2</sub>O<sub>2</sub>, HNO<sub>3</sub> and CH<sub>3</sub>CN) (**Fig. S12**)
  - iv. UV-Vis. spectrum of the mixture ([Ni(Si-NH<sub>2</sub>-DPED)Cl<sub>2</sub>], H<sub>2</sub>O<sub>2</sub>, HNO<sub>3</sub> and CH<sub>3</sub>CN) (**Fig. S13**)
  - v. Peroxidative mechanism of cyclohexane oxidation (**Fig. S14**)

## 1. EDS Analysis of SiO<sub>2</sub> Gel

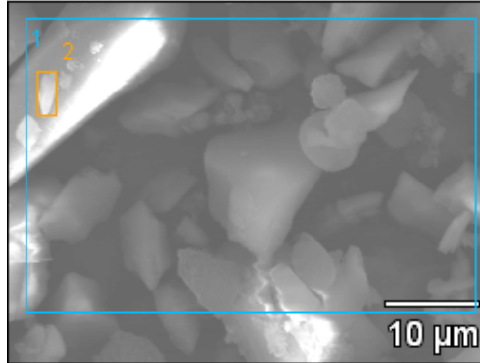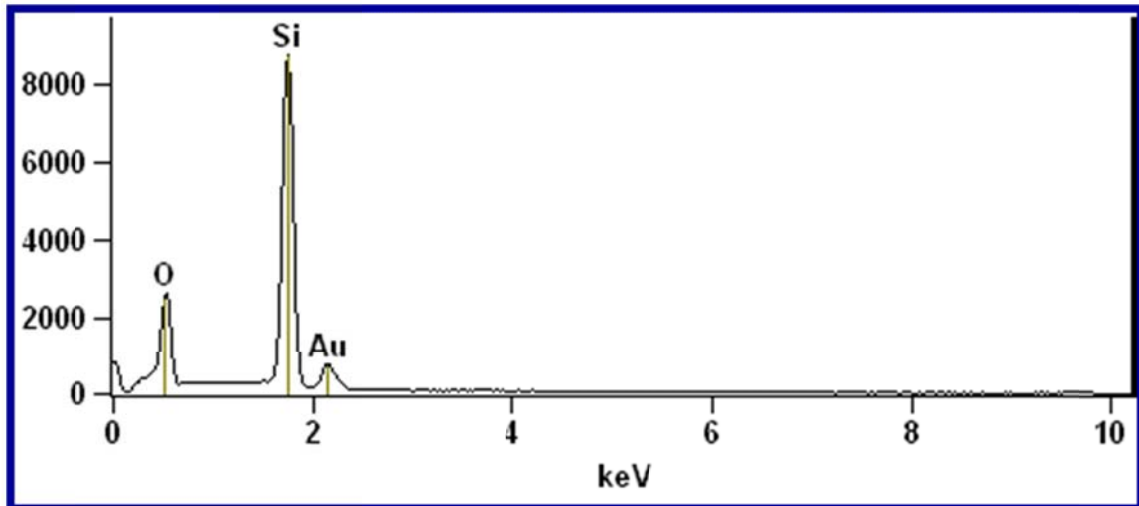

### Net Counts

| <i>O</i> | <i>Si</i> |
|----------|-----------|
| 19873    | 98836     |

### Atom %

| <i>O</i> | <i>Si</i> |
|----------|-----------|
| 55.87    | 44.13     |

## 2. EDS Analysis of Si-NH<sub>2</sub>

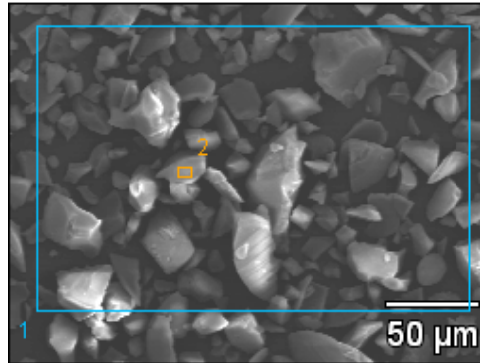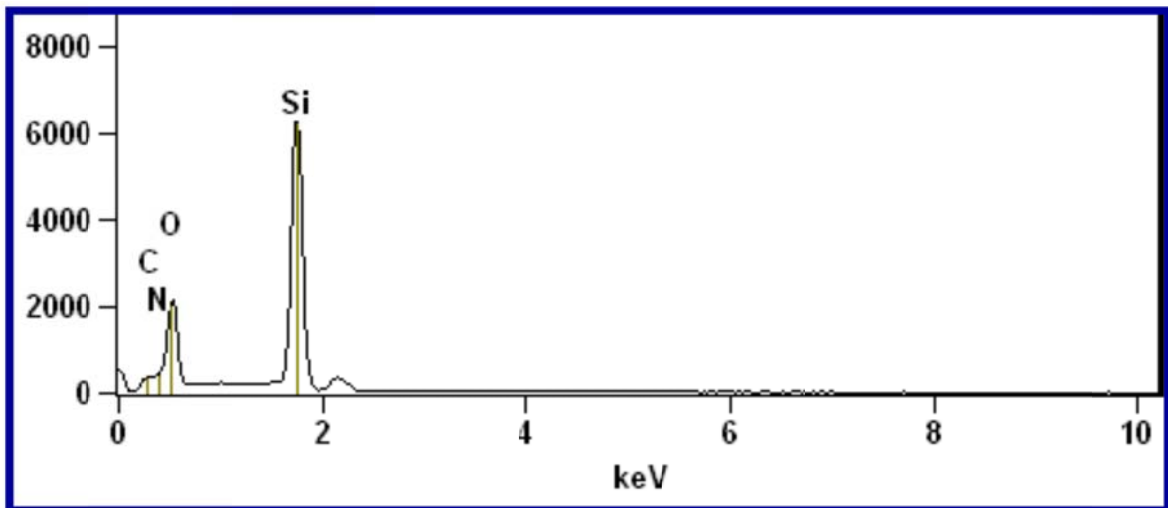

### Net Counts

| <i>C</i> | <i>N</i> | <i>O</i> | <i>Si</i> |
|----------|----------|----------|-----------|
| 3040     | 3005     | 19453    | 72307     |

### Atom %

| <i>C</i> | <i>N</i> | <i>O</i> | <i>Si</i> |
|----------|----------|----------|-----------|
| 16.35    | 15.23    | 46.49    | 21.93     |

### 3. EDS Analysis of Si-NH<sub>2</sub>-DPED

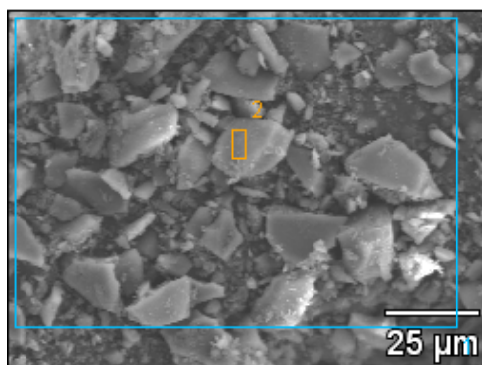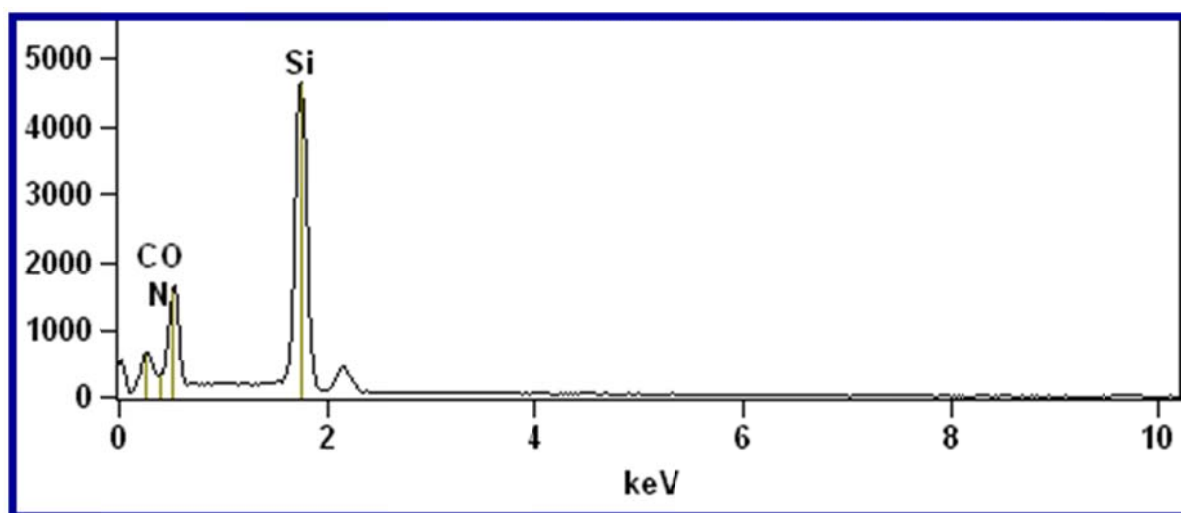

#### Net Counts

| <i>C</i> | <i>N</i> | <i>O</i> | <i>Si</i> |
|----------|----------|----------|-----------|
| 5602     | 1504     | 13500    | 54315     |

#### Atom %

| <i>C</i> | <i>N</i> | <i>O</i> | <i>Si</i> |
|----------|----------|----------|-----------|
| 30.86    | 10.84    | 39.72    | 18.57     |

#### 4. EDS Analysis of [Cu(Si-NH<sub>2</sub>-DPED)Cl<sub>2</sub>]

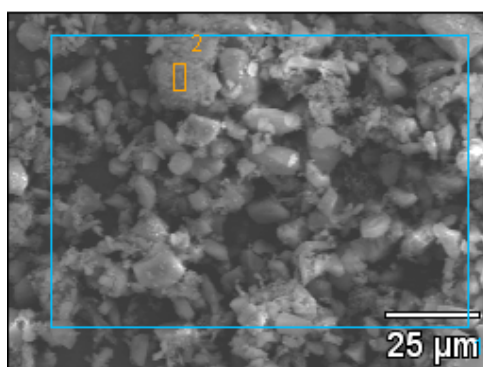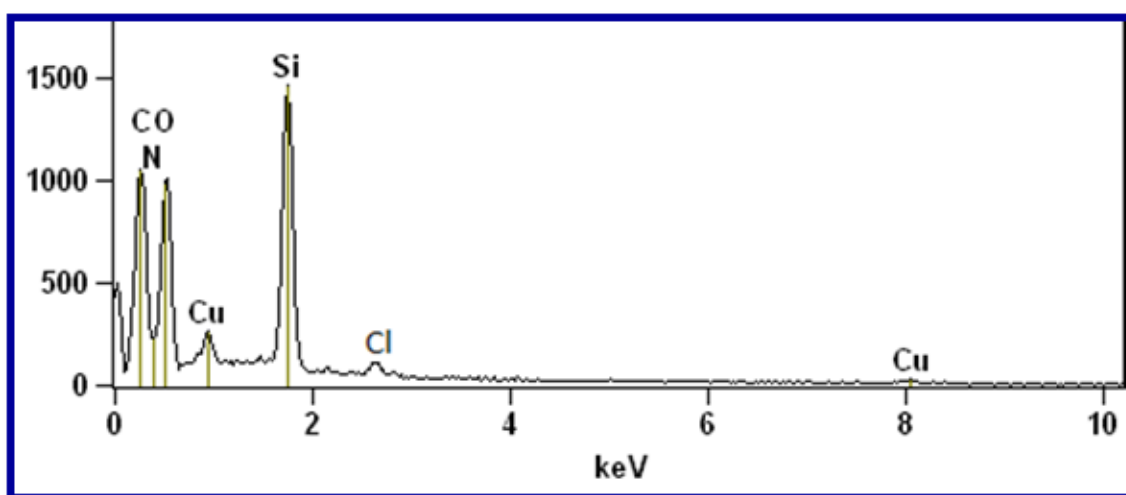

#### Net Counts

| <i>C</i> | <i>N</i> | <i>O</i> | <i>Si</i> | <i>Cu</i> | <i>Cl</i> |
|----------|----------|----------|-----------|-----------|-----------|
| 9401     | 800      | 8554     | 15609     | 322       | 270       |

#### Atom %

| <i>C</i> | <i>N</i> | <i>O</i> | <i>Si</i> | <i>Cu</i> | <i>Cl</i> |
|----------|----------|----------|-----------|-----------|-----------|
| 44.90    | 8.96     | 36.93    | 7.58      | 0.89      | 0.74      |

### 5. EDS Analysis of [Co(Si-NH<sub>2</sub>-DPED)Cl<sub>2</sub>]

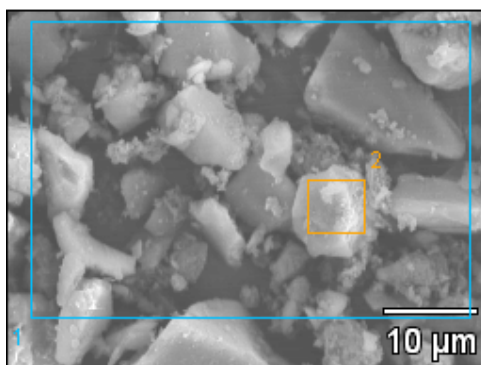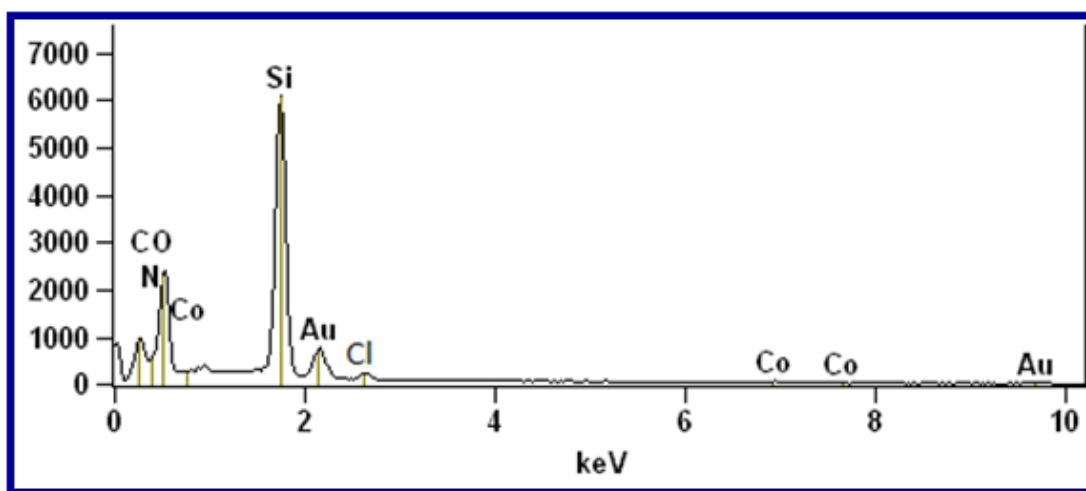

#### Net Counts

| <i>C</i> | <i>N</i> | <i>O</i> | <i>Si</i> | <i>Co</i> | <i>Cl</i> |
|----------|----------|----------|-----------|-----------|-----------|
| 8006     | 2711     | 20277    | 66509     | 399       | 282       |

#### Atom %

| <i>C</i> | <i>N</i> | <i>O</i> | <i>Si</i> | <i>Co</i> | <i>Cl</i> |
|----------|----------|----------|-----------|-----------|-----------|
| 28.82    | 12.84    | 41.57    | 16.14     | 0.34      | 0.29      |

**6. EDS Analysis of [Ni(Si-NH<sub>2</sub>-DPED)Cl<sub>2</sub>]**

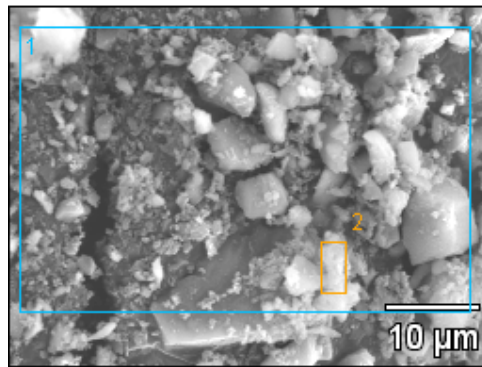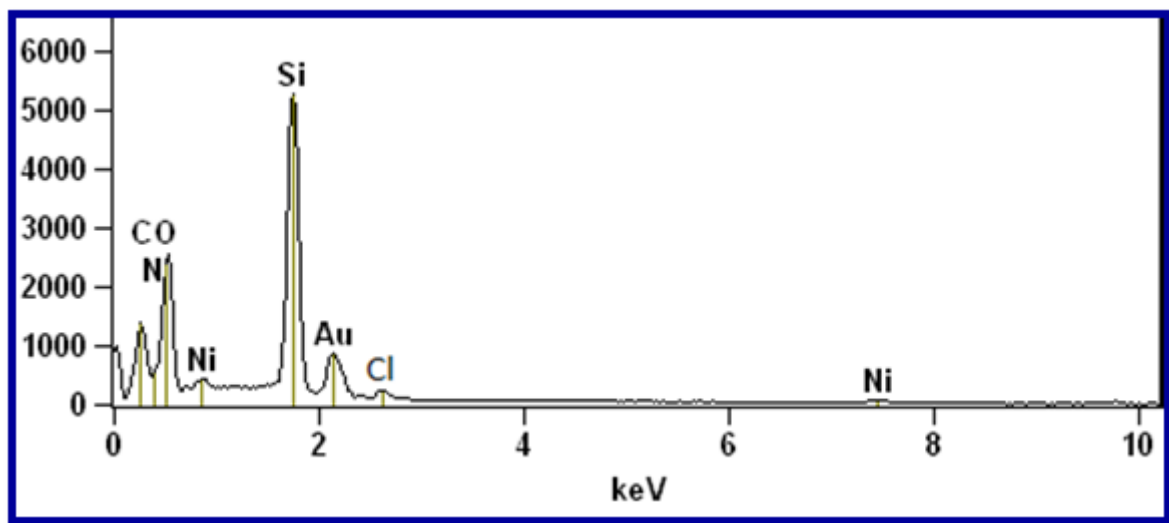

**Net Counts**

| <i>C</i> | <i>N</i> | <i>O</i> | <i>Si</i> | <i>Ni</i> | <i>Cl</i> |
|----------|----------|----------|-----------|-----------|-----------|
| 11551    | 2125     | 21304    | 58759     | 914       | 307       |

**Atom %**

| <i>C</i> | <i>N</i> | <i>O</i> | <i>Si</i> | <i>Ni</i> | <i>Cl</i> |
|----------|----------|----------|-----------|-----------|-----------|
| 34.92    | 10.02    | 40.33    | 13.51     | 0.91      | 0.31      |

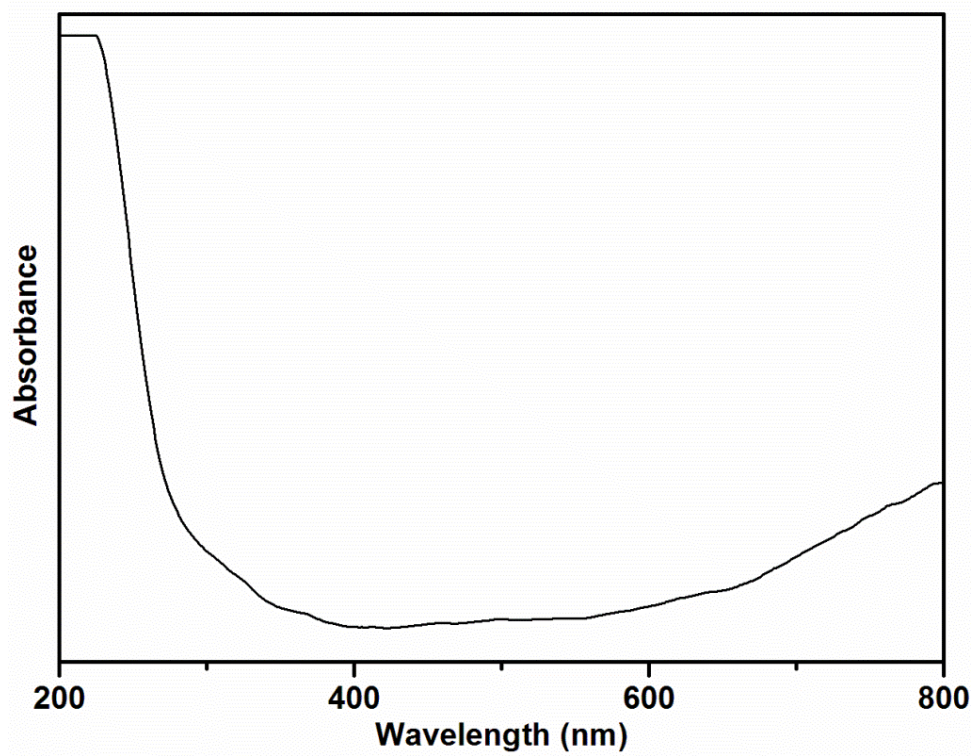

**Figure S1.** UV-Vis. spectrum of SiO<sub>2</sub> gel

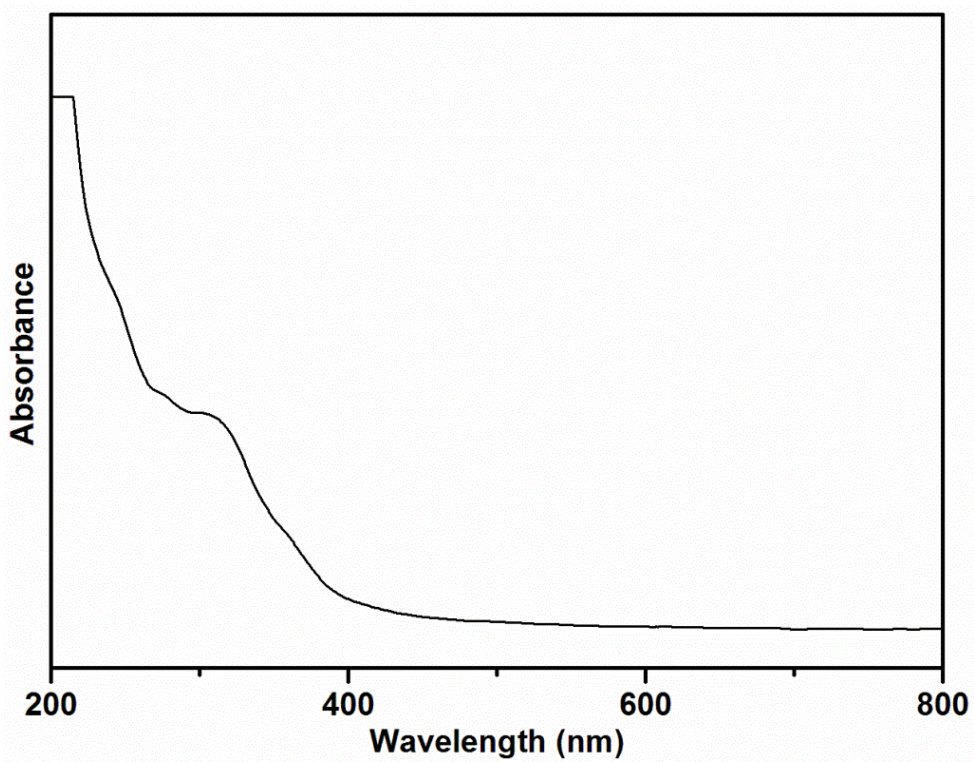

**Figure S2.** UV-Vis. spectrum of Si-NH<sub>2</sub>



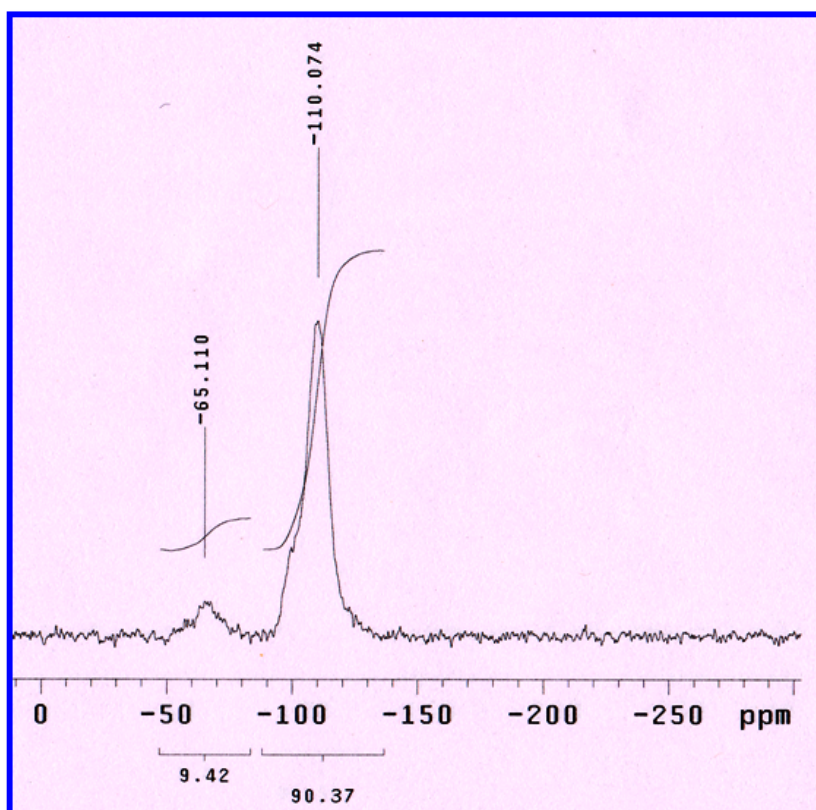

**Figure S3.**  $^{29}\text{Si}$  CP MAS NMR spectrum of Si-NH<sub>2</sub>-DPED

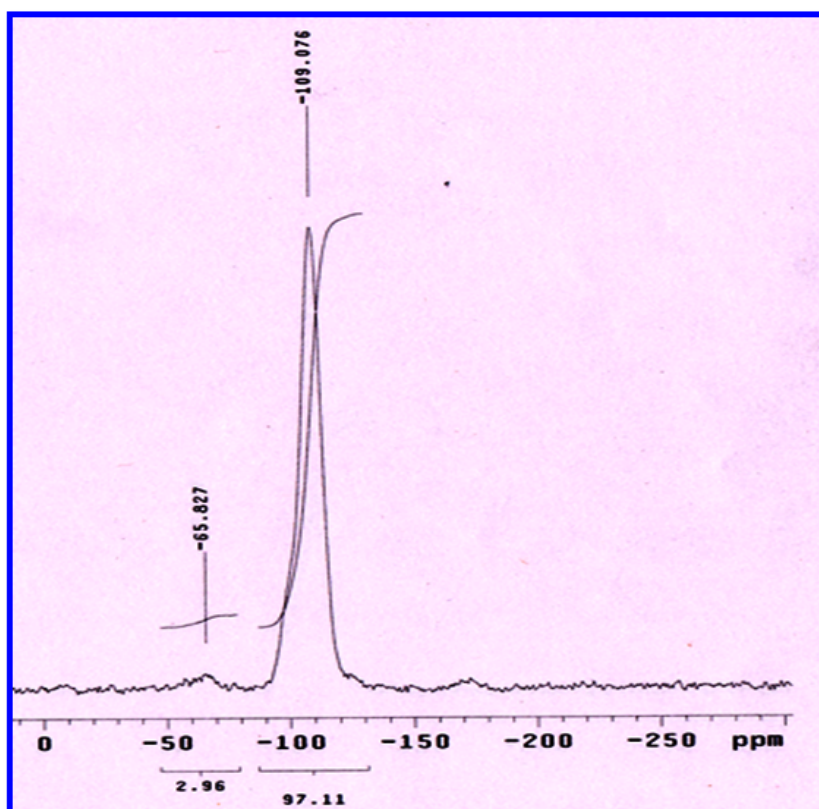

**Figure S4.**  $^{29}\text{Si}$  CP MAS NMR spectrum of [Cu(Si-NH<sub>2</sub>-DPED)Cl<sub>2</sub>]

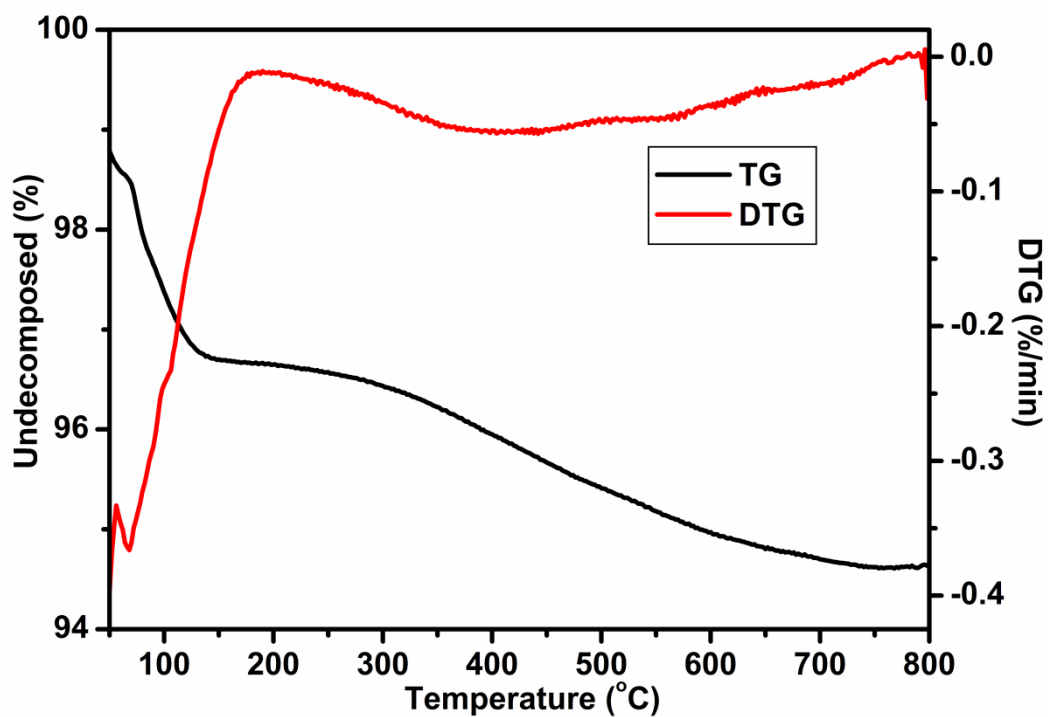

Figure S5. TG-DTG curves of SiO<sub>2</sub> gel

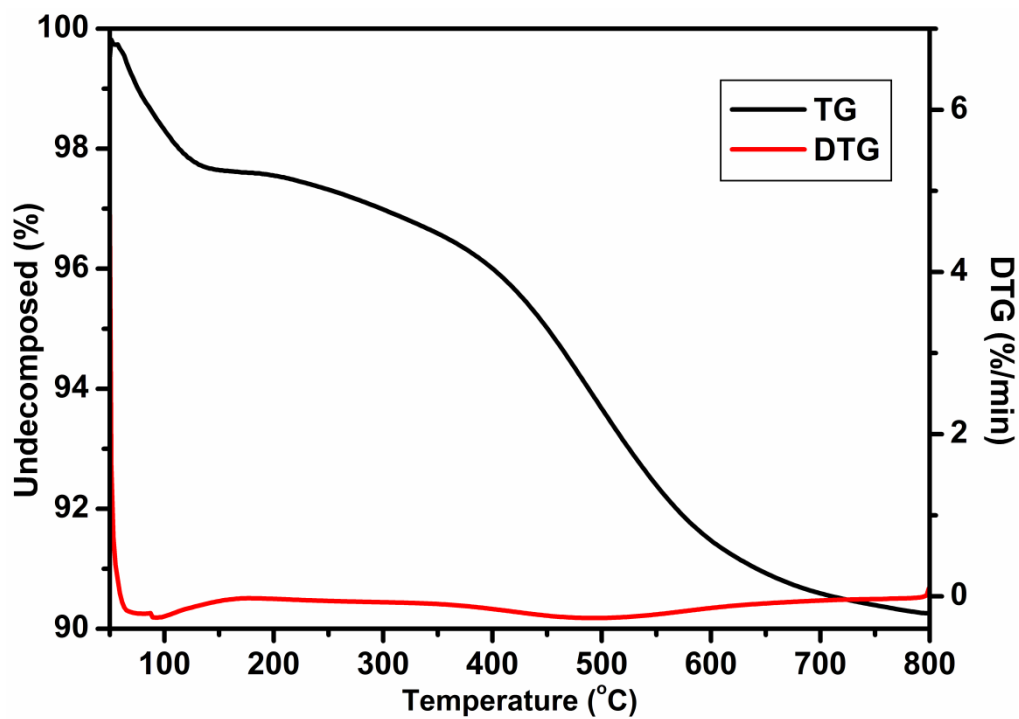

Figure S6. TG-DTG curves of Si-NH<sub>2</sub>

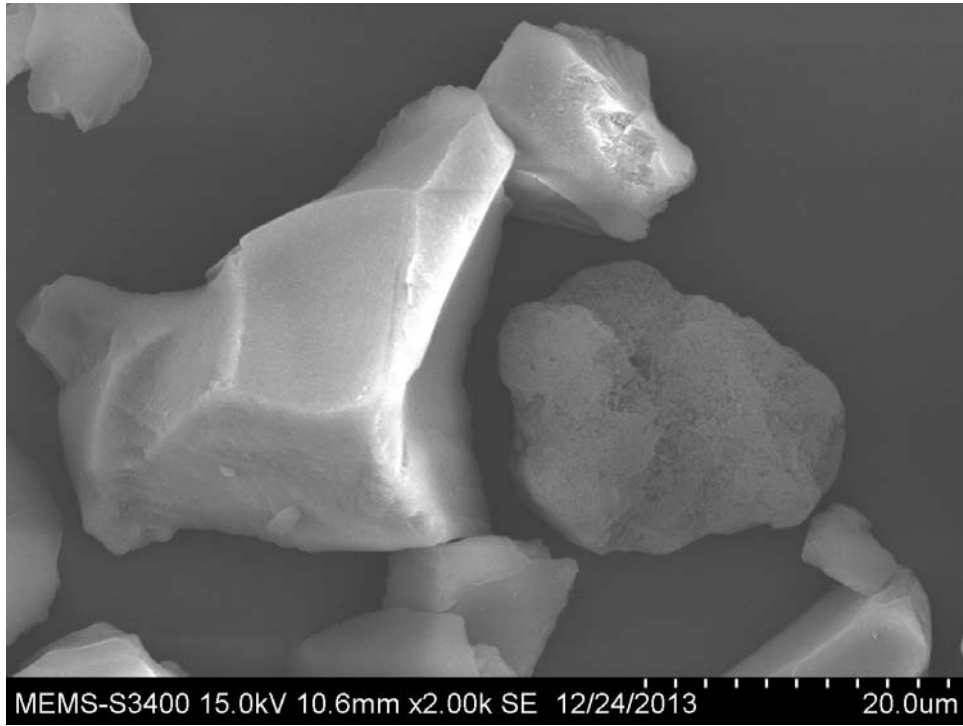

**Figure S7.** SEM image of SiO<sub>2</sub> gel

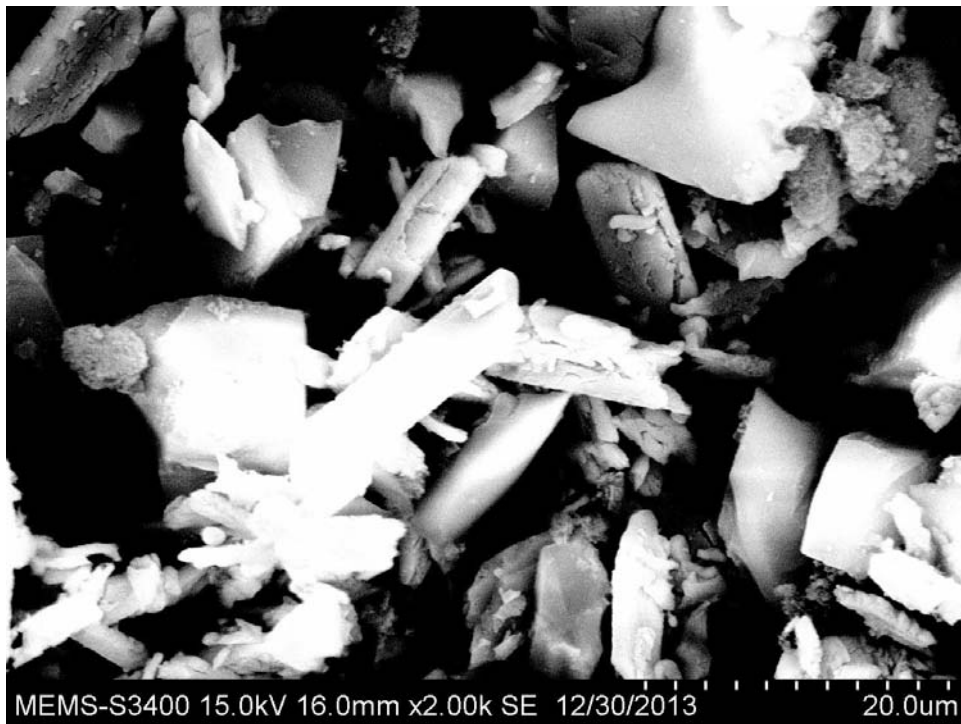

**Figure S8.** SEM image of Si-NH<sub>2</sub>

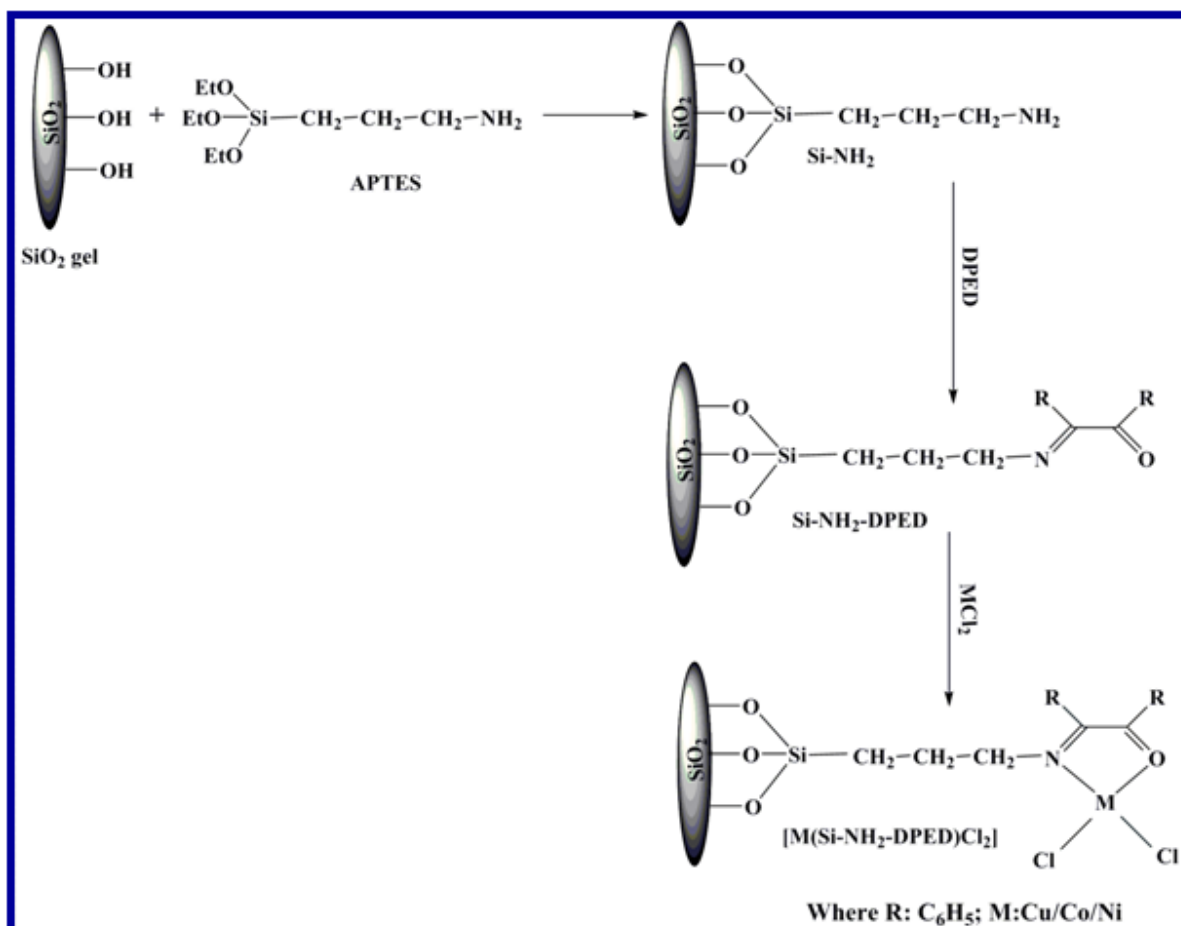

**Figure S9:** Schematic of the synthesis of complexes

**Table 1:** Influence of reaction time on cyclohexane oxidation catalyzed by Cu(II), Co(II) and Ni(II) hybrid catalysts

| No.            | Catalyst                                       | Conversion (%) |    |    |     |     |     |
|----------------|------------------------------------------------|----------------|----|----|-----|-----|-----|
|                |                                                | 2h             | 4h | 6h | 8 h | 10h | 12h |
| 1 <sup>a</sup> | [Cu(Si-NH <sub>2</sub> -DPED)Cl <sub>2</sub> ] | -              | -  | -  | -   | -   | -   |
| 2 <sup>b</sup> | [Cu(Si-NH <sub>2</sub> -DPED)Cl <sub>2</sub> ] | -              | -  | -  | -   | -   | -   |
| 3 <sup>c</sup> | [Cu(Si-NH <sub>2</sub> -DPED)Cl <sub>2</sub> ] | -              | -  | -  | -   | -   | -   |
| 4 <sup>d</sup> | [Cu(Si-NH <sub>2</sub> -DPED)Cl <sub>2</sub> ] | 7              | 15 | 28 | 37  | 41  | 44  |
| 5 <sup>c</sup> | [Co(Si-NH <sub>2</sub> -DPED)Cl <sub>2</sub> ] | -              | -  | -  | -   | -   | -   |
| 6 <sup>d</sup> | [Co(Si-NH <sub>2</sub> -DPED)Cl <sub>2</sub> ] | 5              | 12 | 25 | 32  | 36  | 38  |
| 7 <sup>c</sup> | [Ni(Si-NH <sub>2</sub> -DPED)Cl <sub>2</sub> ] | -              | -  | -  | -   | -   | -   |
| 8 <sup>d</sup> | [Ni(Si-NH <sub>2</sub> -DPED)Cl <sub>2</sub> ] | 4              | 10 | 23 | 31  | 34  | 35  |

## Mechanism of cyclohexane oxidation

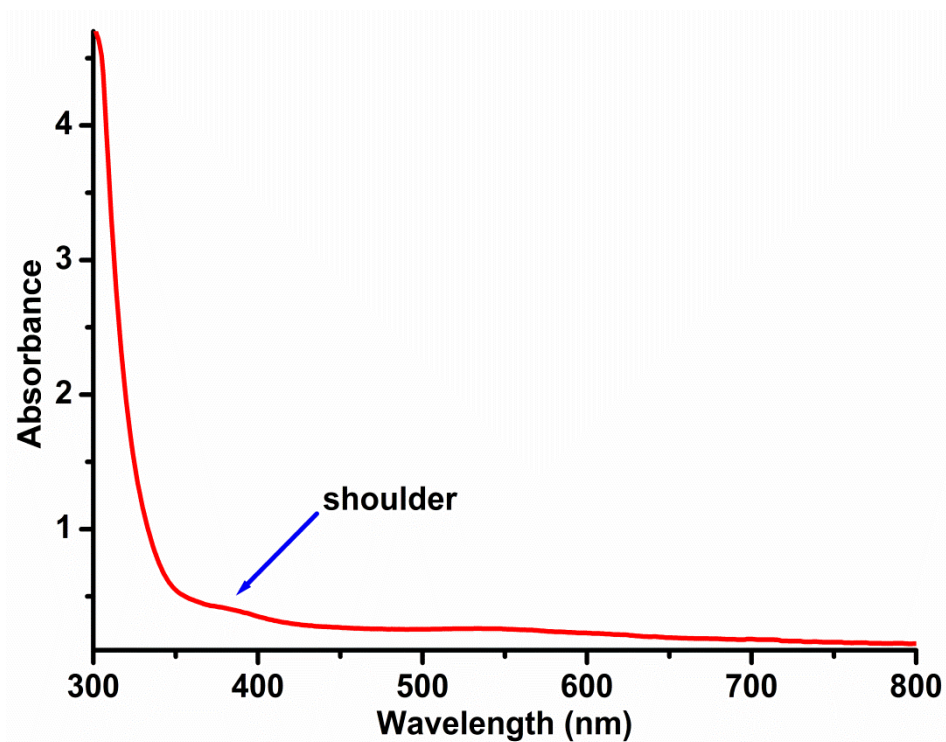

**Fig. S10:** UV-Vis. spectrum of the mixture ( $[\text{Cu}(\text{Si-NH}_2\text{-DPED})\text{Cl}_2]$ ,  $\text{H}_2\text{O}_2$ ,  $\text{HNO}_3$  and  $\text{CH}_3\text{CN}$ )

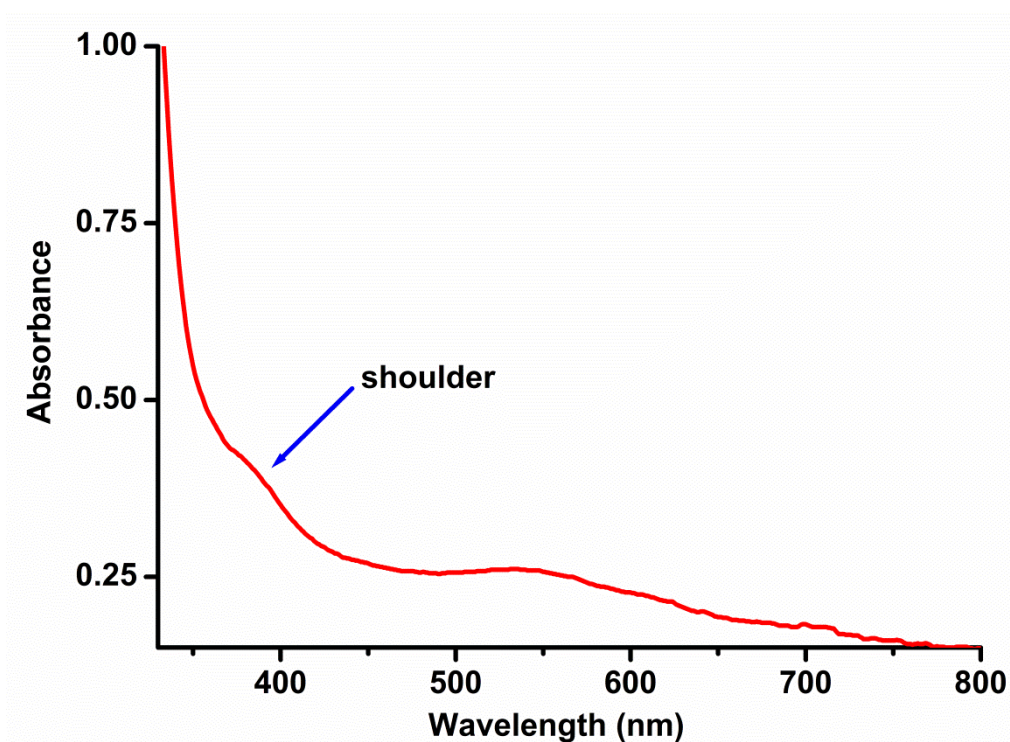

**Fig. S11:** Magnified UV-Vis. spectrum of the mixture ( $[\text{Cu}(\text{Si-NH}_2\text{-DPED})\text{Cl}_2]$ ,  $\text{H}_2\text{O}_2$ ,  $\text{HNO}_3$  and  $\text{CH}_3\text{CN}$ )

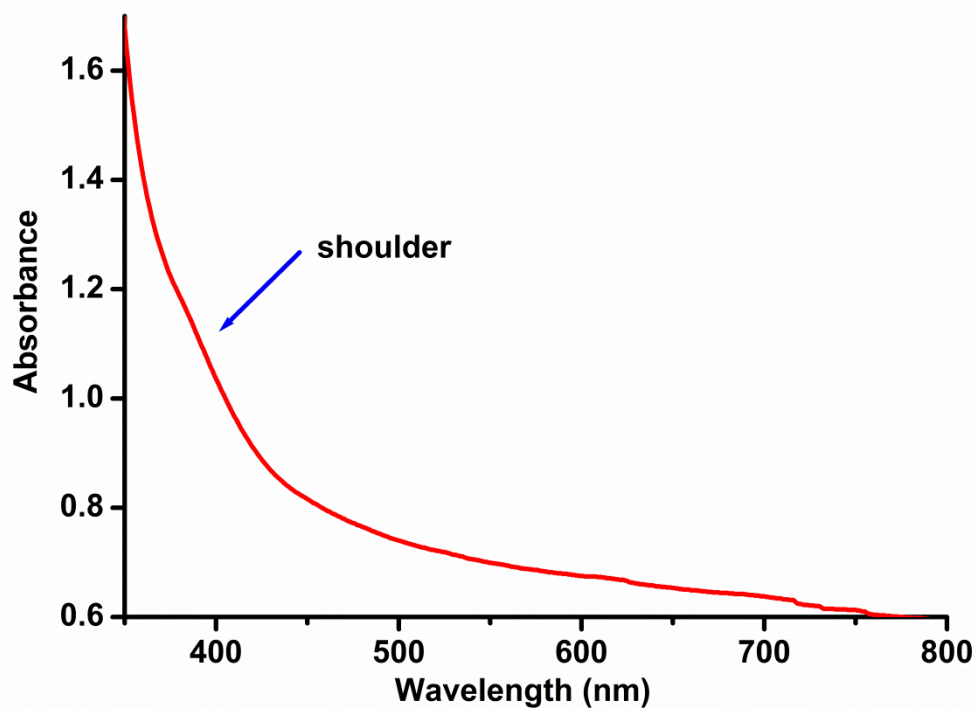

**Fig. S12:** UV-Vis. spectrum of the mixture ( $[\text{Co}(\text{Si-NH}_2\text{-DPED})\text{Cl}_2]$ ,  $\text{H}_2\text{O}_2$ ,  $\text{HNO}_3$  and  $\text{CH}_3\text{CN}$ )

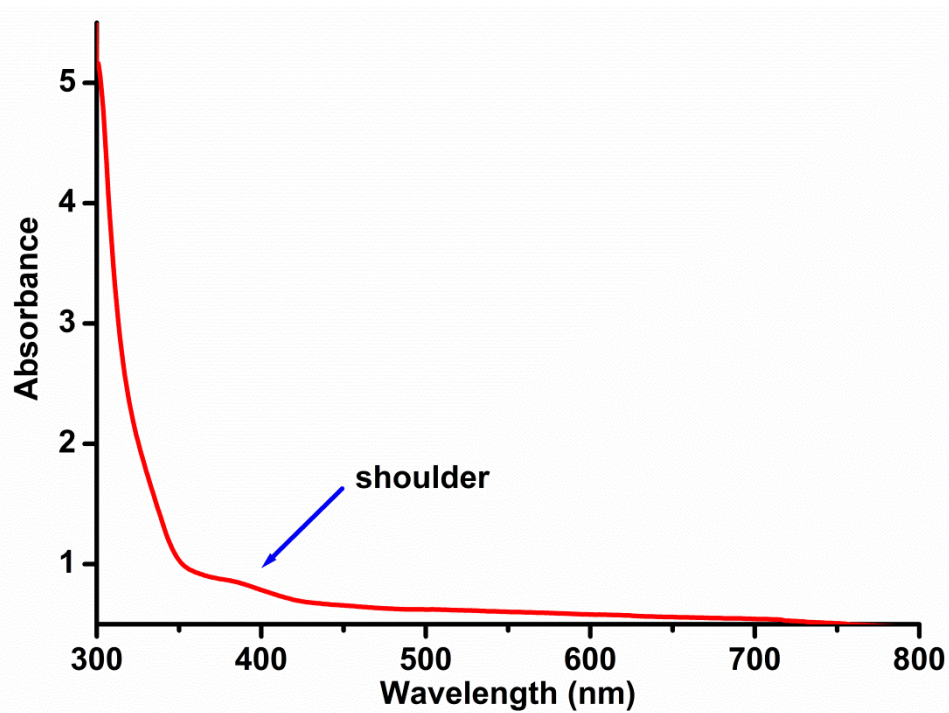

**Fig. S13:** UV-Vis. spectrum of the mixture ( $[\text{Ni}(\text{Si-NH}_2\text{-DPED})\text{Cl}_2]$ ,  $\text{H}_2\text{O}_2$ ,  $\text{HNO}_3$  and  $\text{CH}_3\text{CN}$ )

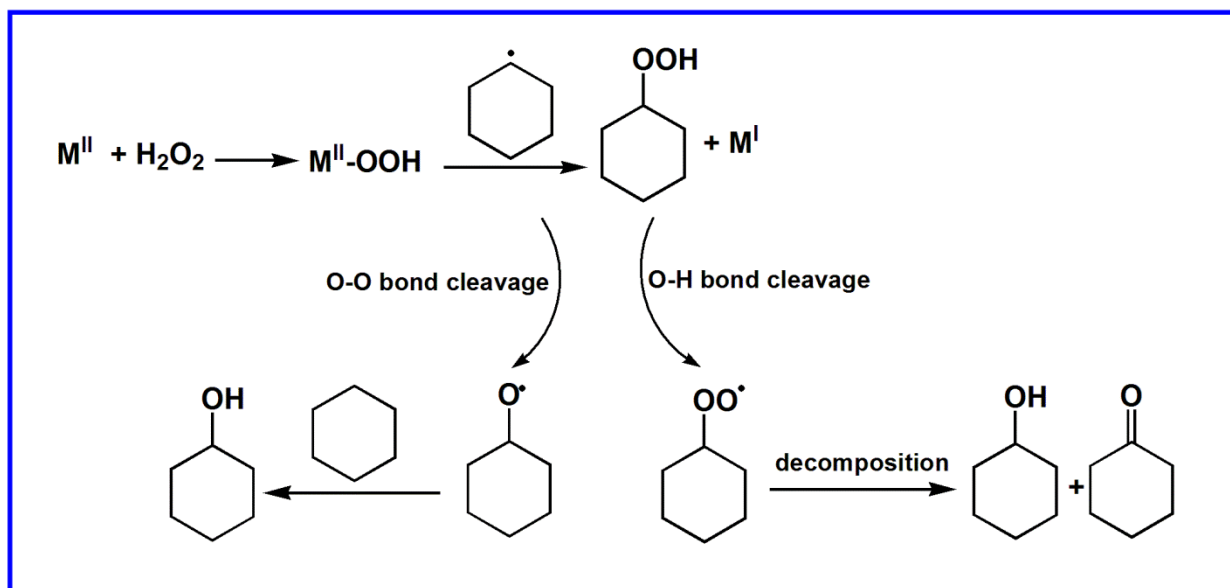

**Fig. S14:** Peroxidative mechanism of cyclohexane oxidation
